# Supplementary material for: Conservation status of the forest beetles (Insecta, Coleoptera) from Azores, Portugal
Source: Biodivers Data J. 2017 Oct 19;(5):e14557. doi: 10.3897/BDJ.5.e14557 (PMC5665008; doi:10.3897/BDJ.5.e14557)
Supplement: Supplementary material 1 — Species raw dat [file bdj-05-e14557-s001.xlsx]

## Sheet: Sheet1
Species Name amd Authority	Kingdom	Phylum	Class	Order	Family	IUCN Status	EOO	AOO	Number of Locations	Elevation Lower Limit (m)	Elevation Upper Limit (m)	Range Elevation	N islands	COR	FLO	FAI	PIC	GRA	SJG	TER	SMG	SMR
Aleochara freyi Bernhauer 1940	Animalia	Arthropoda	Insecta	Coleoptera	Staphylinidae	CR	8	8	1	1200	1800	600	1				1
Atheta azorica Bernhauer, 1936	Animalia	Arthropoda	Insecta	Coleoptera	Staphylinidae	DD	4	4	1			0	0
Atheta caprariensis Israelson, 1985	Animalia	Arthropoda	Insecta	Coleoptera	Staphylinidae	CR	8	8	1	500	600	100	1								1
Atheta dryochares Israelson, 1985	Animalia	Arthropoda	Insecta	Coleoptera	Staphylinidae	LC	25220	104	13	400	1200	800	7			1	1	1	1	1	1	1
Atheta floresensis Pace, 2004	Animalia	Arthropoda	Insecta	Coleoptera	Staphylinidae	CR	8	8	1	200	500	300	1		1
Athous azoricus Platia & Gudenzi, 2002	Animalia	Arthropoda	Insecta	Coleoptera	Elateridae	EN	14000	44	5	50	300	250	3					1		1	1
Athous pomboi Platia & Borges, 2002	Animalia	Arthropoda	Insecta	Coleoptera	Elateridae	CR	40	40	4	100	550	450	1									1
Atlantocis gillerforsi Israelson, 1985	Animalia	Arthropoda	Insecta	Coleoptera	Ciidae	EN	34000	64	11	350	1000	650	5		1		1			1	1	1
Bembidion derelictus Alluaud, 1926	Animalia	Arthropoda	Insecta	Coleoptera	Carabidae	CR -EX	12	12	1	562	870	308	1		1
Bradycellus chavesi Alluaud, 1919	Animalia	Arthropoda	Insecta	Coleoptera	Carabidae	CR -EX	4	4	1			0	1								1
Calacalles azoricus Stüben, 2004	Animalia	Arthropoda	Insecta	Coleoptera	Curculionidae	CR	4	4	1	800	1000	200	1			1
Calacalles droueti (Crotch, 1867)	Animalia	Arthropoda	Insecta	Coleoptera	Curculionidae	EN	706	28	7	600	1200	600	3		1	1	1
Calacalles subcarinatus (Israelson, 1984)	Animalia	Arthropoda	Insecta	Coleoptera	Curculionidae	LC	42600	220	33	100	1200	1100	9	1	1	1	1	1	1	1	1	1
Calathus carvalhoi Serrano & Borges, 1986	Animalia	Arthropoda	Insecta	Coleoptera	Carabidae	CR	8	8	1	634	700	66	1							1
Calathus extensicollis Putzeys, 1863	Animalia	Arthropoda	Insecta	Coleoptera	Carabidae	EX	16	16	1			0	1				1
Calathus lundbladi Colas, 1938	Animalia	Arthropoda	Insecta	Coleoptera	Carabidae	CR	43	36	1			0	1								1
Calathus vicenteorum Schatzmayr, 1939	Animalia	Arthropoda	Insecta	Coleoptera	Carabidae	EX	4	4	1			0	1									1
Catops velhocabrali Blas & Borges, 1998	Animalia	Arthropoda	Insecta	Coleoptera	Leiodidae	CR	12	12	1	450	550	100	1									1
Caulotrupis parvus Israelson, 1985	Animalia	Arthropoda	Insecta	Coleoptera	Curculionidae	CR	8	8	2	310	550	240	1									1
Cedrorum azoricus Borges & Serrano, 1993	Animalia	Arthropoda	Insecta	Coleoptera	Carabidae	EN	12311	40	6	500	1200	700	3				1			1		1
Cryptolestes azoricus (Ratti, 1972)	Animalia	Arthropoda	Insecta	Coleoptera	Laemophloeidae	CR	4	4	1	400	550	150	1									1
Donus (Antidonus) multifidus (Israelson, 1984)	Animalia	Arthropoda	Insecta	Coleoptera	Curculionidae	CR	4	4	1	450	550	100	1									1
Drouetius azoricus (Drouet, 1859)	Animalia	Arthropoda	Insecta	Coleoptera	Curculionidae	EN	23800	76	11	0	500	500	7	1	1	1		1	1	1	1
Drouetius borgesi Machado, 2009	Animalia	Arthropoda	Insecta	Coleoptera	Curculionidae	EN	11600	92	17	300	1100	800	6			1	1	1	1	1	1
Drouetius oceanicus Machado, 2009	Animalia	Arthropoda	Insecta	Coleoptera	Curculionidae	EN	22000	40	6	0	200	200	6	1		1		1	1	1	1
Euconnus azoricus Franz, 1969	Animalia	Arthropoda	Insecta	Coleoptera	Staphylinidae	EN	7000	44	3	10	800	790	3				1			1	1
Geostiba melanocephala (Crotch, 1867)	Animalia	Arthropoda	Insecta	Coleoptera	Staphylinidae	CR	4	4	1			0	1								1
Heteroderes azoricus (Tarnier, 1860)	Animalia	Arthropoda	Insecta	Coleoptera	Elateridae	EN	39000	200	35	0	300	300	9	1	1	1	1	1	1	1	1	1
Medon varamontis Assing, 2013	Animalia	Arthropoda	Insecta	Coleoptera	Staphylinidae	CR	4	4	1	1000	1200	200	1								1
Metophthalmus occidentalis Israelson, 1984	Animalia	Arthropoda	Insecta	Coleoptera	Latridiidae	EN	23000	48	7	100	550	450	4			1		1			1	1
Mniophilosoma obscurum Gillerfors, 1986	Animalia	Arthropoda	Insecta	Coleoptera	Chrysomelidae	CR	13	4	1	560	880	320	1		1
Neocnemis occidentalis Crotch, 1867	Animalia	Arthropoda	Insecta	Coleoptera	Curculionidae	EX	4	4	1	450	550	100	1									1
Nesotes azoricus (Crotch, 1867)	Animalia	Arthropoda	Insecta	Coleoptera	Tenebrionidae	CR -EX	8	8	1	500	600	100	1								1
Olisthopus inclavatus Israelson, 1983	Animalia	Arthropoda	Insecta	Coleoptera	Carabidae	CR	35	32	4	150	300	150	1									1
Phloeosinus gillerforsi Bright, 1987	Animalia	Arthropoda	Insecta	Coleoptera	Curculionidae	EN	10100	40	8	0	1200	1200	5		1		1		1	1	1
Phloeostiba azorica (Fauvel, 1900)	Animalia	Arthropoda	Insecta	Coleoptera	Staphylinidae	EN	8800	36	8	300	1200	900	6		1		1	1	1	1	1
Phytosus schatzmayri Bernhauer, 1941	Animalia	Arthropoda	Insecta	Coleoptera	Staphylinidae	CR -EX	12	12	1	0	200	200	1								1
Pseudanchomenus aptinoides Tarnier, 1860	Animalia	Arthropoda	Insecta	Coleoptera	Carabidae	CR	16	16	3	400	1200	800	2				1				1
Pseudechinosoma nodosum Hustache, 1936	Animalia	Arthropoda	Insecta	Coleoptera	Curculionidae	EN	33700	100	13	400	1200	800	7		1	1	1		1	1	1	1
Sphaericus velhocabrali Israelson, 1984	Animalia	Arthropoda	Insecta	Coleoptera	Anobiidae	CR	8	8	1	0	150	150	1									1
Tarphius acuminatus Gillerfors, 1986	Animalia	Arthropoda	Insecta	Coleoptera	Zopheridae	CR	8	8	2	600	800	200	1				1
Tarphius azoricus Gillerfors, 1986	Animalia	Arthropoda	Insecta	Coleoptera	Zopheridae	EN	6300	72	5	500	1000	500	2		1						1
Tarphius depressus Gillerfors, 1985	Animalia	Arthropoda	Insecta	Coleoptera	Zopheridae	CR	24	24	6	200	500	300	1									1
Tarphius floresensis Borges & Serrano, 2017	Animalia	Arthropoda	Insecta	Coleoptera	Zopheridae	CR	90	72	10	300	1000	700	1		1
Tarphius furtadoi Borges & Serrano, 2017	Animalia	Arthropoda	Insecta	Coleoptera	Zopheridae	EN	890	48	8	250	1000	750	3			1	1		1
Tarphius gabrielae Borges & Serrano, 2017	Animalia	Arthropoda	Insecta	Coleoptera	Zopheridae	CR	8	8	1	700	850	150	1				1
Tarphius pomboi Borges, 1991	Animalia	Arthropoda	Insecta	Coleoptera	Zopheridae	CR	20	20	4	200	500	300	1									1
Tarphius relictus Borges & Serrano, 2017	Animalia	Arthropoda	Insecta	Coleoptera	Zopheridae	CR	8	8	1	200	300	100	1							1
Tarphius rufonodulosus Israelson, 1984	Animalia	Arthropoda	Insecta	Coleoptera	Zopheridae	CR	28	28	4	200	500	300	1									1
Tarphius serranoi Borges, 1991	Animalia	Arthropoda	Insecta	Coleoptera	Zopheridae	CR	8	8	1	400	500	100	1									1
Tarphius tornvalli Gillerfors, 1985	Animalia	Arthropoda	Insecta	Coleoptera	Zopheridae	CR	380	52	7	500	1000	500	1								1
Tarphius wollastoni Crotch, 1867	Animalia	Arthropoda	Insecta	Coleoptera	Zopheridae	CR	8	8	1	800	1000	200	1			1
Trechus terrabravensis Borges, Serrano & Amorim, 2004	Animalia	Arthropoda	Insecta	Coleoptera	Carabidae	CR	32	32	4	500	1000	500	1							1
Trechus torretassoi Jeannel, 1937	Animalia	Arthropoda	Insecta	Coleoptera	Carabidae	CR EX	24	12	2	700	845	145	1								1

## Sheet: Sheet2
NOME CIENTIFICO	COR	FLO	FAI	PIC	GRA	SJG	TER	SMG	SMR
Aleochara freyi Bernhauer 1940				1
Atheta azorica Bernhauer, 1936
Atheta caprariensis Israelson, 1985								1
Atheta dryochares Israelson, 1985			1	1	1	1	1	1	1
Atheta floresensis Pace, 2004		1
Athous azoricus Platia & Gudenzi, 2002					1		1	1
Athous pomboi Platia & Borges, 2002									1
Atlantocis gillerforsi Israelson, 1985		1		1			1	1	1
Bembidion derelictus Alluaud, 1926		1
Bradycellus chavesi Alluaud, 1919								1
Calacalles azoricus Stüben, 2004			1
Calacalles droueti (Crotch, 1867)		1	1	1
Calacalles subcarinatus (Israelson, 1984)	1	1	1	1	1	1	1	1	1
Calathus carvalhoi Serrano & Borges, 1986							1
Calathus extensicollis Putzeys, 1863				1
Calathus lundbladi Colas, 1938								1
Calathus vicenteorum Schatzmayr, 1939									1
Catops velhocabrali Blas & Borges, 1998									1
Caulotrupis parvus Israelson, 1985									1
Cedrorum azoricus Borges & Serrano, 1993				1			1		1
Cryptolestes azoricus (Ratti, 1972)									1
Donus (Antidonus) multifidus (Israelson, 1984)									1
Drouetius azoricus (Drouet, 1859)	1	1	1		1	1	1	1
Drouetius borgesi Machado, 2009			1	1	1	1	1	1
Drouetius oceanicus Machado, 2009	1		1		1	1	1	1
Euconnus azoricus Franz, 1969				1			1	1
Geostiba melanocephala (Crotch, 1867)								1
Heteroderes azoricus (Tarnier, 1860)	1	1	1	1	1	1	1	1	1
Medon varamontis Assing, 2013								1
Metophthalmus occidentalis Israelson, 1984			1		1			1	1
Mniophilosoma obscurum Gillerfors, 1986		1
Neocnemis occidentalis Crotch, 1867									1
Nesotes azoricus (Crotch, 1867)								1
Olisthopus inclavatus Israelson, 1983									1
Phloeosinus gillerforsi Bright, 1987		1		1		1	1	1
Phloeostiba azorica (Fauvel, 1900)		1		1	1	1	1	1
Phytosus schatzmayri Bernhauer, 1941								1
Pseudanchomenus aptinoides Tarnier, 1860				1				1
Pseudechinosoma nodosum Hustache, 1936		1	1	1		1	1	1	1
Sphaericus velhocabrali Israelson, 1984									1
Tarphius acuminatus Gillerfors, 1986				1
Tarphius azoricus Gillerfors, 1986		1						1
Tarphius depressus Gillerfors, 1985									1
Tarphius floresensis Borges & Serrano, 2017		1
Tarphius furtadoi Borges & Serrano, 2017			1	1		1
Tarphius gabrielae Borges & Serrano, 2017				1
Tarphius pomboi Borges, 1991									1
Tarphius relictus Borges & Serrano, 2017							1
Tarphius rufonodulosus Israelson, 1984									1
Tarphius serranoi Borges, 1991									1
Tarphius tornvalli Gillerfors, 1985								1
Tarphius wollastoni Crotch, 1867			1
Trechus terrabravensis Borges, Serrano & Amorim, 2004							1
Trechus torretassoi Jeannel, 1937								1
